# Supplementary material for: Ethical Concerns of and Risk Mitigation Strategies for Crowdsourcing Contests and Innovation Challenges: Scoping Review
Source: PubMed Central journal article supplement (PMC5866301; doi:10.2196/jmir.8226), 2018-03-09
Supplement: jmir_v20i3e75_app1.pdf [file jmir_v20i3e75_app1.pdf]

**1Additional File 1. Call for entries from a condom promotion video contest in China, 22015 (translated from Mandarin Chinese).**

3SESH is calling for creative one-minute videos promoting condom usage! Condoms can be  
4bought anywhere, from “7-11” stores to vending machines, but there are still embarrassment  
5and taboos about buying them and most importantly, using them. We are calling for a video  
6that can change how people view using condoms. Finalist videos will be promoted on local,  
7regional, national networks.

8We are accepting videos from May 1- June 7th! Please submit your video through our website  
9by filling out the submission form: xxxxxx

**10Purpose:**

11) To increase condom use among those who do not use condoms

**12Judging Criteria:**

13) capacity to increase condom use

14) capacity to be share-able or “go viral”

15) provide value to the individual.

**16In-person Events**

17May 7th

18Guangdong Pharmacy University, University city- 11:30am-6pm

19Sun Yatsen University, Medical Campus- 7pm-9pm

20May 18

21Guangdong Traditional Medicine University 11:30-5:30pm

22May 19

23South China Normal University- 7:30pm-9:00pm

24June 1

25Southern Medical University

**27Workshops**

28May 16th

29Mega University City, Guangzhou

30

31If you are interested in holding an event, please email xxxxxx !

32

33 Follow our WeChat and Weibo for more information!

34 WeChat: Seshchina

35 Weibo: [weibo.com/seshglobal](http://weibo.com/seshglobal)

36 Website: [www.seshglobal.org](http://www.seshglobal.org)

37

38

39

40

41

42
